# Supplementary material
Source: PubMed Central journal article supplement (PMC2740594)

**Supplemental Figure 1. The association of AQP4 with the detergent-resistant membranes (DRM) is dependent on cholesterol in astrocytes.** (A) Detergent resistant membranes (DRM) and non-detergent resistant membranes (Non-DRM) were harvested from astrocytes incubated for 8h with 0.5  $\mu\text{g/ml}$  of the cholesterol-sequestering agent, filipin. Immunoblots were probed for the transferrin receptor (TfR),  $\alpha$ -tubulin,  $\beta$ -DG, AQP4, flotillin-1 and caveolin-1 and the dot blot labeled for GM1. (B) Proteins from astrocytes incubated for 1h with 20 mM of the cholesterol-extracting agent, methyl  $\beta$ -cyclodextrin (M $\beta$ CD), were harvested in DRM and Non-DRM and immunoblotted for AQP4 and flotillin-1.

**Supplemental Figure 2. The morphology of astrocytes remains unchanged after laminin treatment.** (A-C) Astrocytes were incubated in the absence or (D-F) the presence of 30 nM laminin and labeled for laminin (A, and D). The plasma membrane of these cells was labeled using wheat germ agglutinin conjugated to Alexa Fluor 568 (WGA; B and E). Scale bar, 45  $\mu\text{m}$ .

**Supplemental Figure 3. Laminin induces the coclustering of GM1-containing lipid rafts with AchR and  $\beta$ -DG in C2C12 myotubes.** (A-D) Differentiated C2C12 myotubes were incubated in the absence or (E-H) the presence of 30 nM laminin overnight and labeled for GM1 using FITC-conjugated cholera toxin subunit B (A and E), acetylcholine receptors (AchR) using RITC-conjugated  $\alpha$ -bungarotoxin (B and F) and  $\beta$ -DG (C and G). Scale bar, 8  $\mu\text{m}$ .

**Supplemental Figure 4. Laminin but not agrin or fibronectin clusters the the GM1-containing lipid rafts in astrocytes.** (A-D) Astrocytes were incubated with 30 nM laminin, (E-H) 10 nM C-agrin 4,8 or (I-L) 100 nM fibronectin and labeled for GM1 (A, E and I),  $\beta$ -DG (B, F and J) and AQP4 (C, G and K). Scale bar, 45  $\mu\text{m}$ .

**Supplemental Figure 5. The disruption of lipid rafts with the cholesterol-sequestering agent, filipin, inhibits  $\beta$ -DG, AQP4 and laminin clustering.** (A-F) Astrocytes incubated with 30 nM laminin or (G-L) 30 nM laminin and 0.5  $\mu\text{g/ml}$  of filipin were double immunolabeled for  $\beta$ -DG (A, G) and laminin (B, H) or  $\beta$ -DG (D, J) and AQP4 (E, K). Scale bar, 50  $\mu\text{m}$ .

**Supplemental Figure 6. Cholesterol depletion does not alter dystroglycan and AQP4 expression levels in astrocytes.** Western blot analysis of  $\alpha$ -DG,  $\beta$ -DG and AQP4 total expression levels was performed in astrocytes treated with 10  $\mu\text{M}$  (+Mevastatin) and control astrocytes (+DMSO).

**Supplemental Figure 7. The morphology of astrocytes remains unchanged after dystroglycan and AQP4 silencing.** (A-C) Astrocytes transfected with siCTL, siDAG1 and siAQP4 were immunolabeled for the glial fibrillary acidic protein (GFAP) and (D-F) corresponding differential interference contrast photomicrographs are shown (DIC). Scale bar, 30  $\mu\text{m}$ .

**Supplemental Figure 8.  $\beta$ -DG remains associated with non-detergent-resistant membranes in laminin-treated astrocytes.** Proteins from astrocytes incubated with (+LAM) or without 30 nM laminin (-LAM) were harvested in detergent resistant membranes (DRM) and non-detergent resistant membranes (Non-DRM) and blotted for AQP4,  $\beta$ -DG and GM1.

# Supplemental Figure. 1

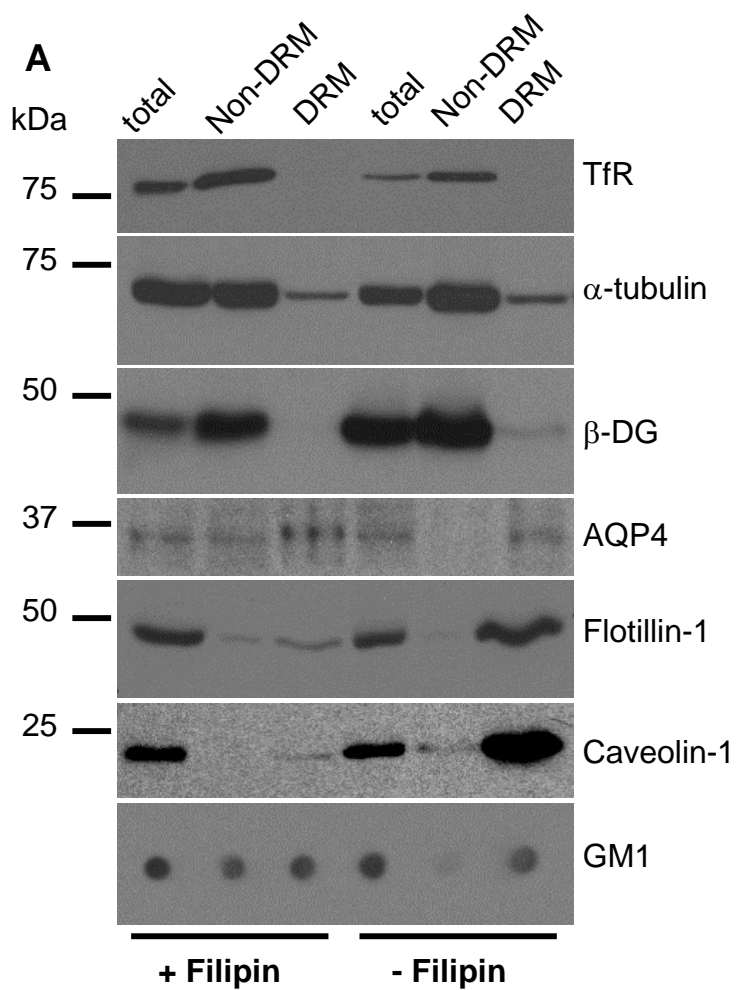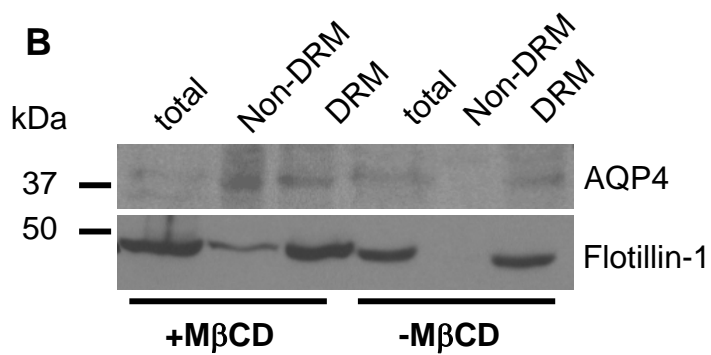

Supplemental Figure. 2

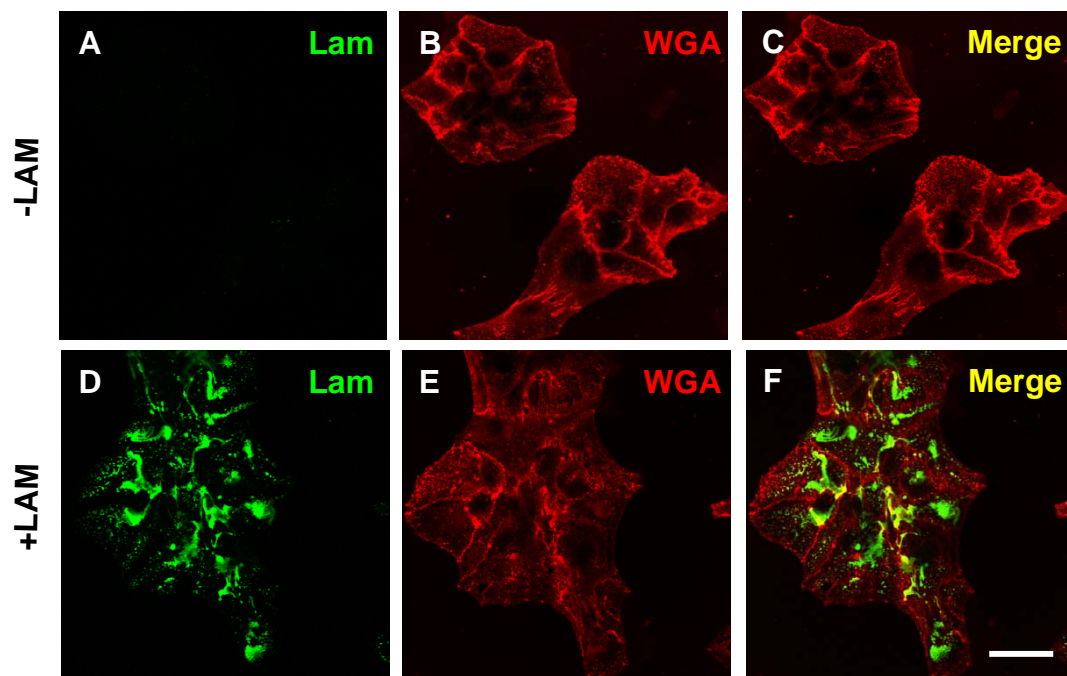

Supplemental Figure. 3

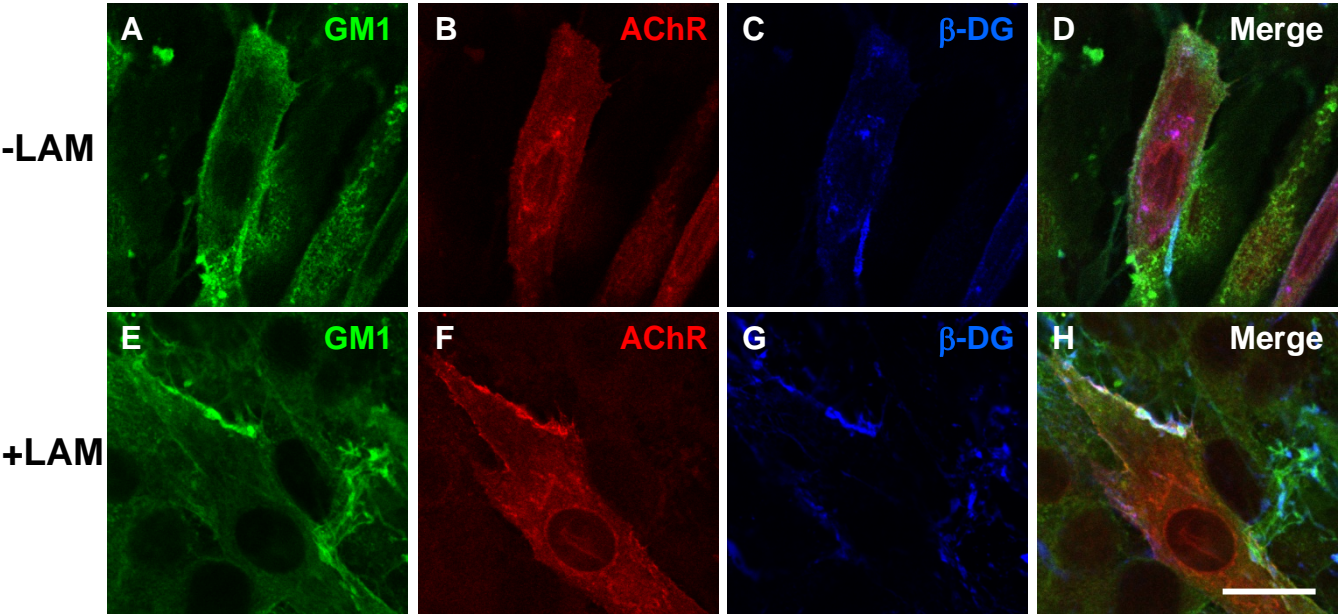

Supplemental Figure. 4

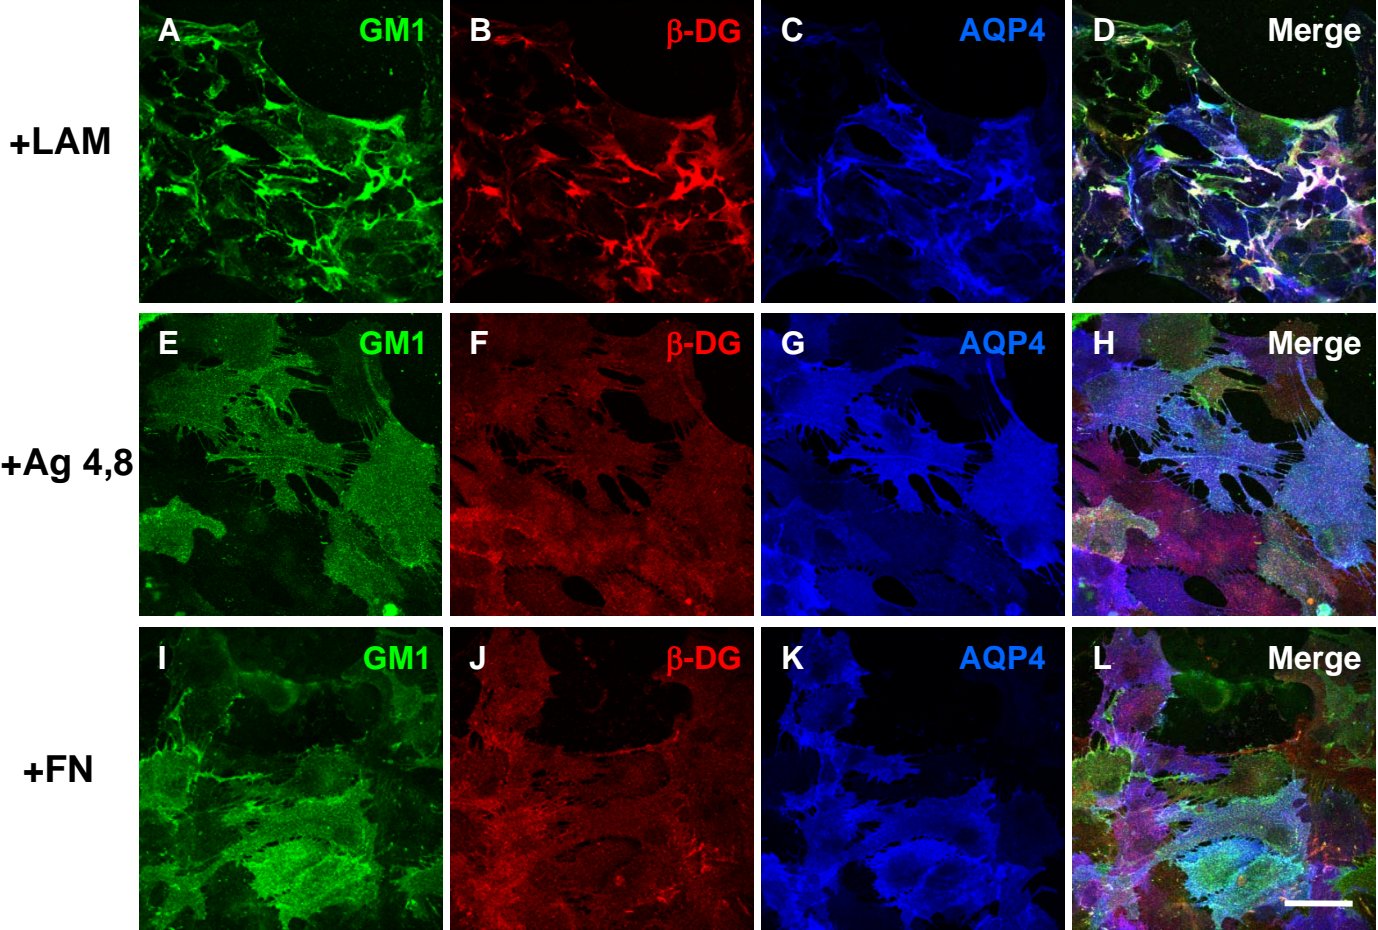

Supplemental Figure. 5

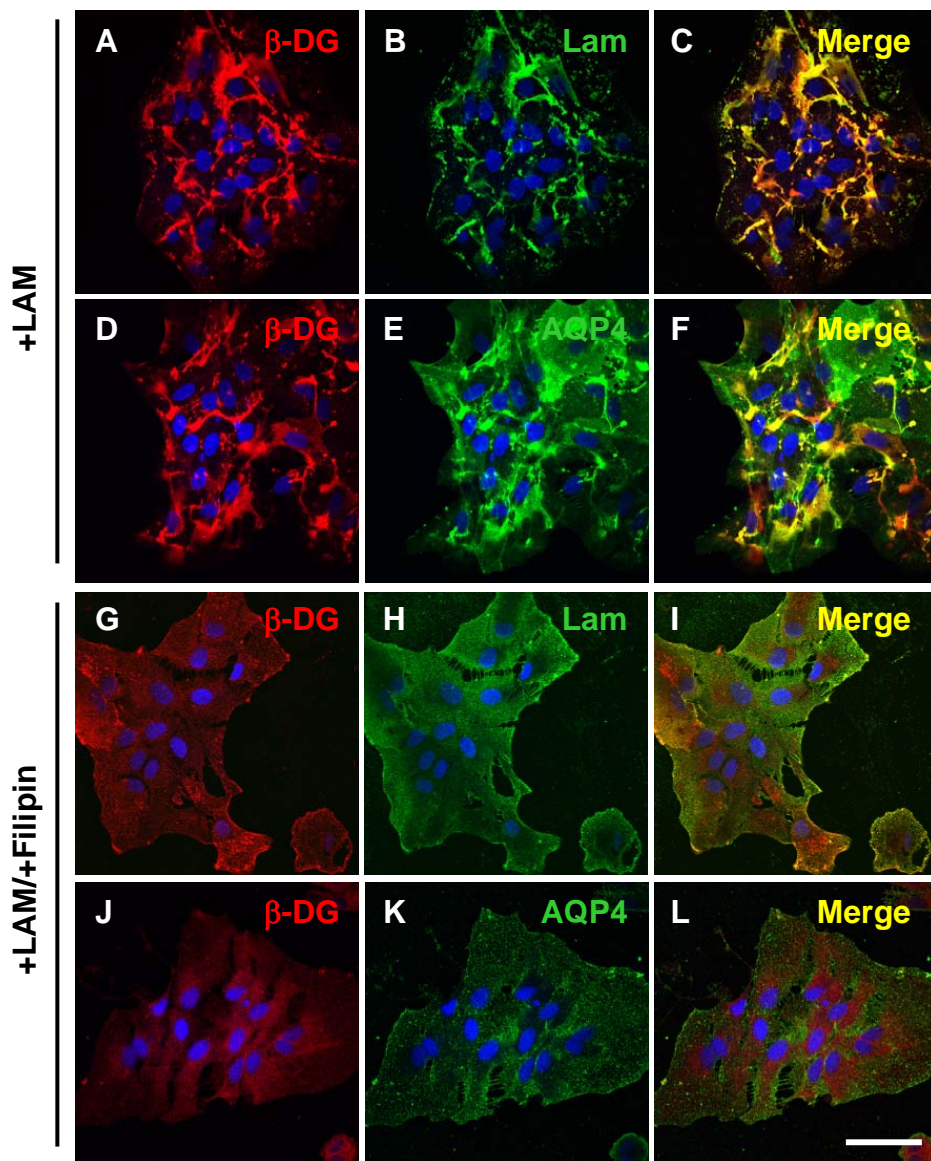

# Supplemental Figure. 6

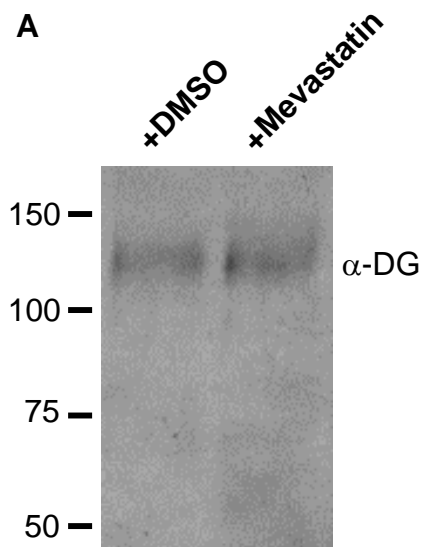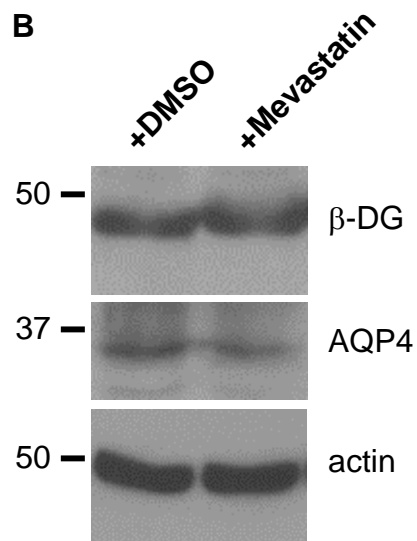

Supplemental Figure. 7

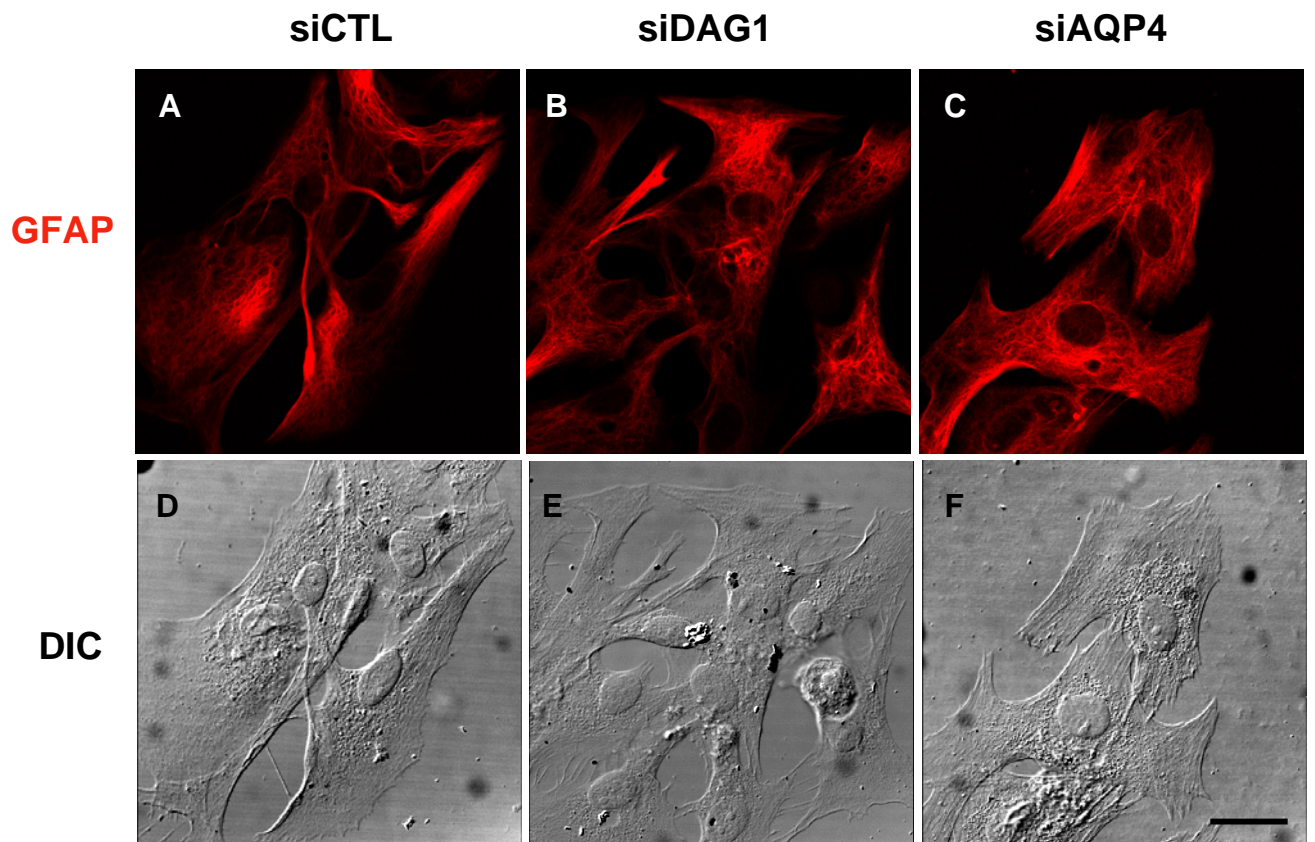



Supplemental Figure. 8

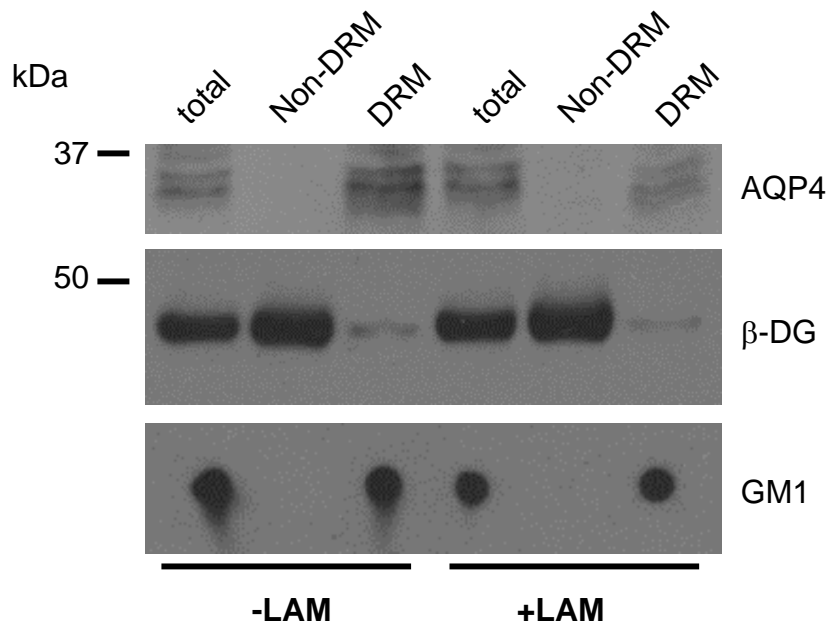

Supplement: supp_M109.010090_Suppdata.pdf [file supp_M109.010090_Suppdata.pdf]
